# Supplementary material for: Polyethylene glycol-functionalized benzylidene cyclopentanone dyes for two-photon excited photodynamic therapy
Source: Royal Society of Chemistry journal article supplement (doi:10.1039/c0ob01278e), 2011-01-01

## Electronic Supplementary Informations

### Polyethylene Glycol-Functionalized Benzylidene Cyclopentanone

#### Dyes for Two-Photon Excited Photodynamic Therapy

Yuxia Zhao<sup>a</sup>, Weijia Wang<sup>a,c</sup>, Feipeng Wu<sup>a\*</sup>, Yang Zhou<sup>b</sup>, Naiyan Huang<sup>b</sup>, Ying Gu<sup>b</sup>,  
Qianli Zou<sup>a,c</sup> and Wei Yang<sup>a,c</sup>

<sup>a</sup>Technical Institute of Physics and Chemistry, Chinese Academy of Sciences, Beijing 100190, P. R. China. <sup>b</sup>Department of Laser Medicine, Chinese PLA General Hospital, Beijing 100853, P. R. China. <sup>c</sup>Graduate School of Chinese Academy of Science, Beijing, 100049, P. R. China.

\*Corresponding author: [fpwu@mail.ipc.ac.cn](mailto:fpwu@mail.ipc.ac.cn)

#### Two-photon absorption (TPA) characterization

TPA cross-section ( $\sigma$ ) values of compounds in n-octanol ( $2 \times 10^{-4}$  M) were determined using the two-photon excited fluorescence (TPEF) technique following the experimental protocol described in detail by Xu and Webb.<sup>1</sup> The excitation light sources were a mode-locked Tsunami Ti:sapphire laser (720–880 nm, 80 MHz, <130 fs). Two-photon excited fluorescence spectra were recorded in a direction perpendicular to the laser beam using a fiber spectrometer (Ocean Optics USB2000 CCD) as detector. Rhodamine B in methanol solution ( $10^{-4}$  M) was used as reference, whose  $\sigma$  values in the range of 720–880 nm was reported by Xu and Webb.<sup>1</sup> The  $\sigma$  values of dyes **A1-B4** were calculated according to equation (1) by comparing their TPEF intensities with that of Rhodamine B under the same measurement conditions.<sup>2</sup>

$$\sigma_s = \frac{S_s \Phi_r \varphi_r C_r}{S_r \Phi_s \varphi_s C_s} \sigma_r \quad (1)$$

Here, the subscripts r and s stand for the reference and sample, respectively.  $S$  is the integral area of the two-photon-excited fluorescence.  $\Phi$  is the fluorescence quantum yield.  $\varphi$  is the overall fluorescence collection efficiency of the experimental apparatus.  $C$  is the number density of the molecules in solution.

To avoid any contribution from other photophysical or photochemical processes, the intensity of input pulses were adjusted to a proper regime to ensure a quadratic dependence of the fluorescence intensity versus excitation pulse energy. It is shown in Fig. S1 that slopes around 2 are obtained for all dyes in the logarithmic plots of the fluorescence intensities induced by TPA vs. excitation intensities at 800 nm.

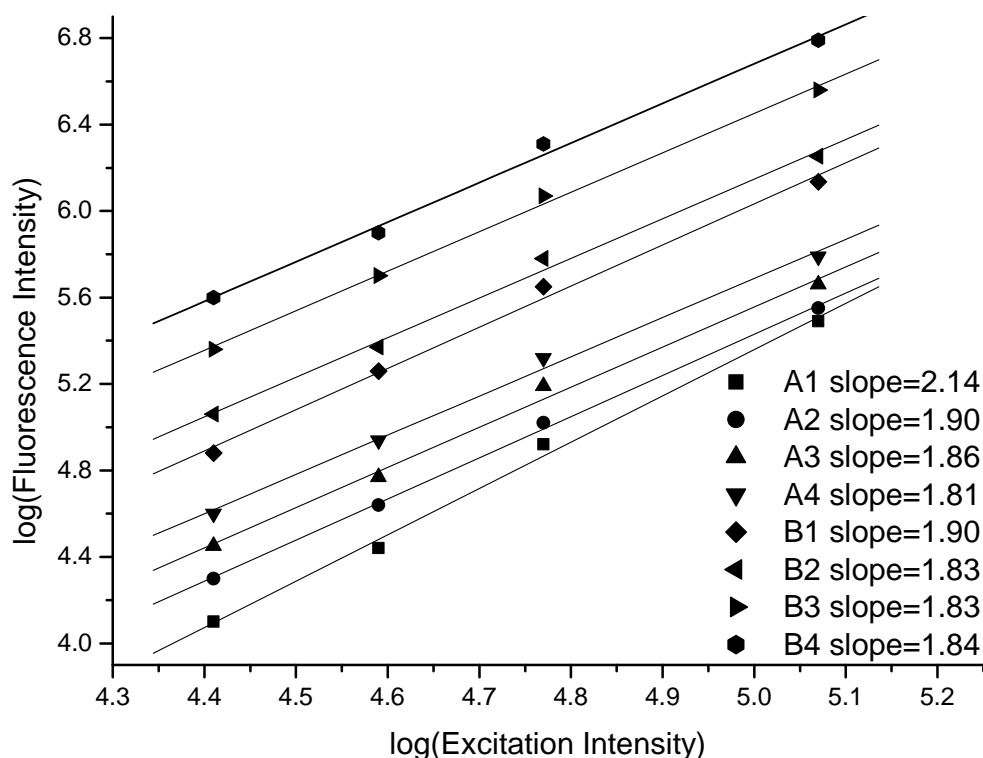

**Fig. S1** Logarithmic plots of the fluorescence intensities induced by TPA vs. excitation intensities at 800 nm of dyes **A1-B4** in n-octanol ( $2 \times 10^{-4}$  M).

#### Reference:

1. C. Xu and W. W. Webb, *J. Opt. Soc. Am. B*, 1996, **13**, 481.
2. M. Rumi, J. E. Ehrlich, A. A. Heikal, J. W. Perry, S. Barlow, Z.-Y. Hu, D. McCord-Maughon, T. C. Parker, H. Röckel, S. Thayumanavan, S. R. Marder, D. Beljonne and J.-L. Brédas, *J. Am. Chem. Soc.* 2000, **122**, 9500.

## $^1\text{H}$ NMR and $^{13}\text{C}$ NMR Spectra of compounds A4-B4

### 1. $^1\text{H}$ NMR spectrum of dye **A1** ( $\text{CDCl}_3$ , 400MHz)

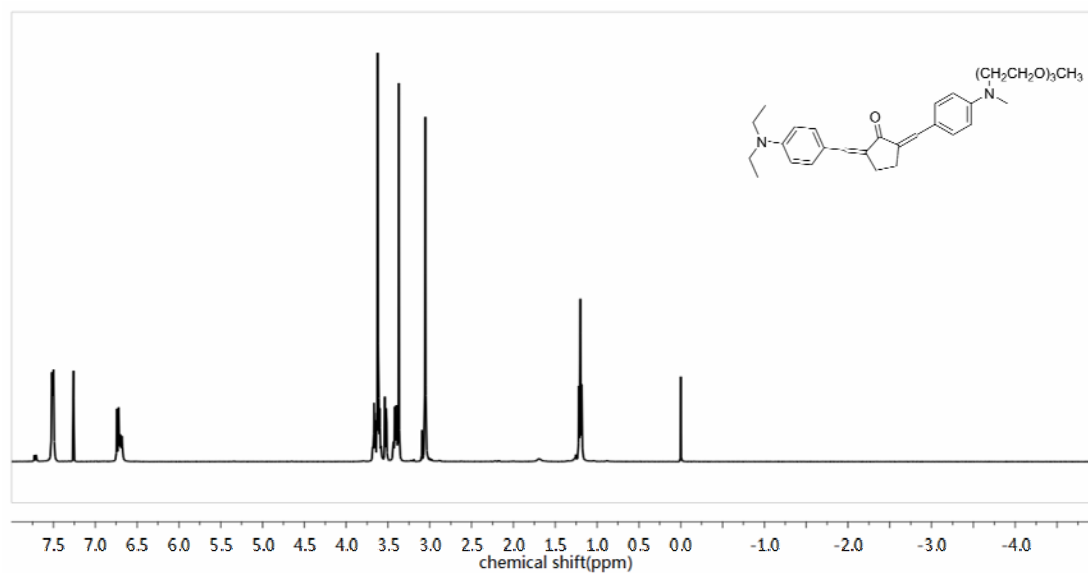

### 2. $^{13}\text{C}$ NMR spectrum of dye **A1** ( $\text{CDCl}_3$ , 400MHz)

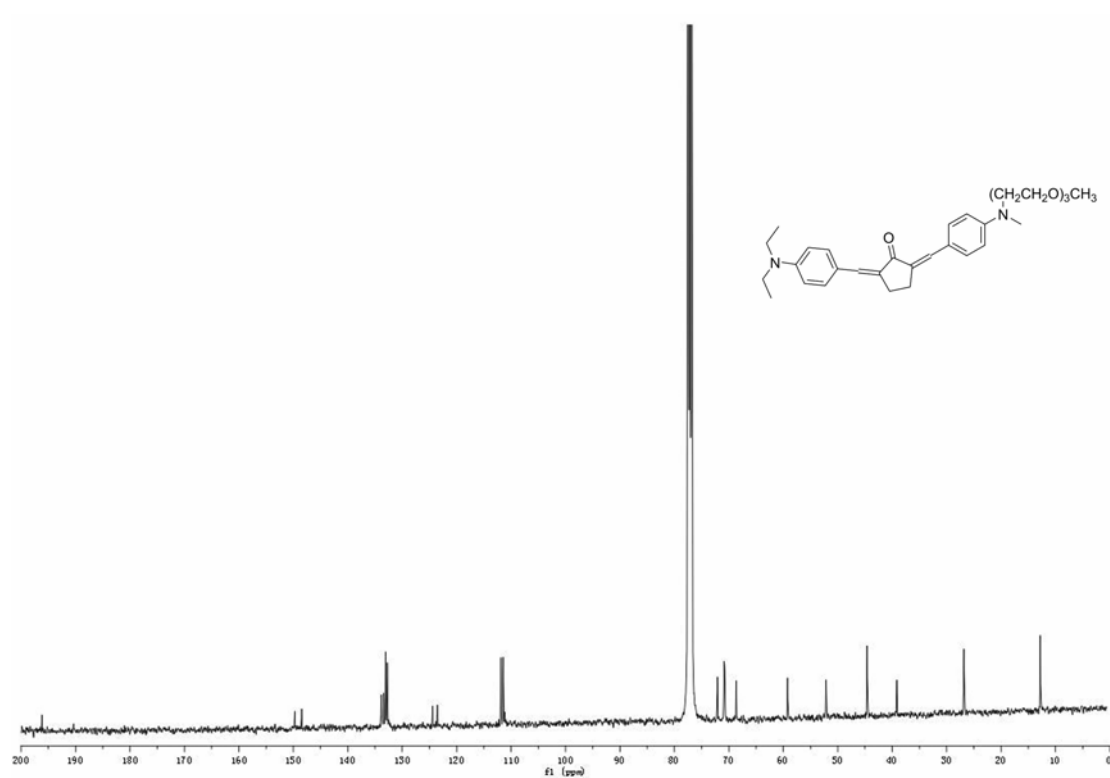

3.  $^1\text{H}$ NMR spectrum of dye **A2** ( $\text{CDCl}_3$ , 400MHz)

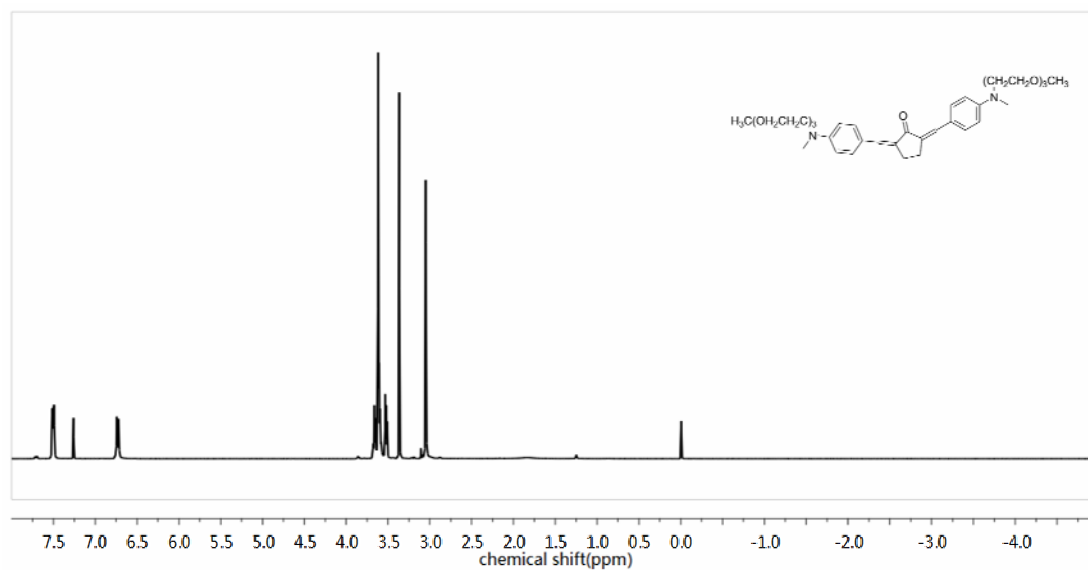

4.  $^{13}\text{C}$ NMR spectrum of dye **A2** ( $\text{CDCl}_3$ , 400MHz)

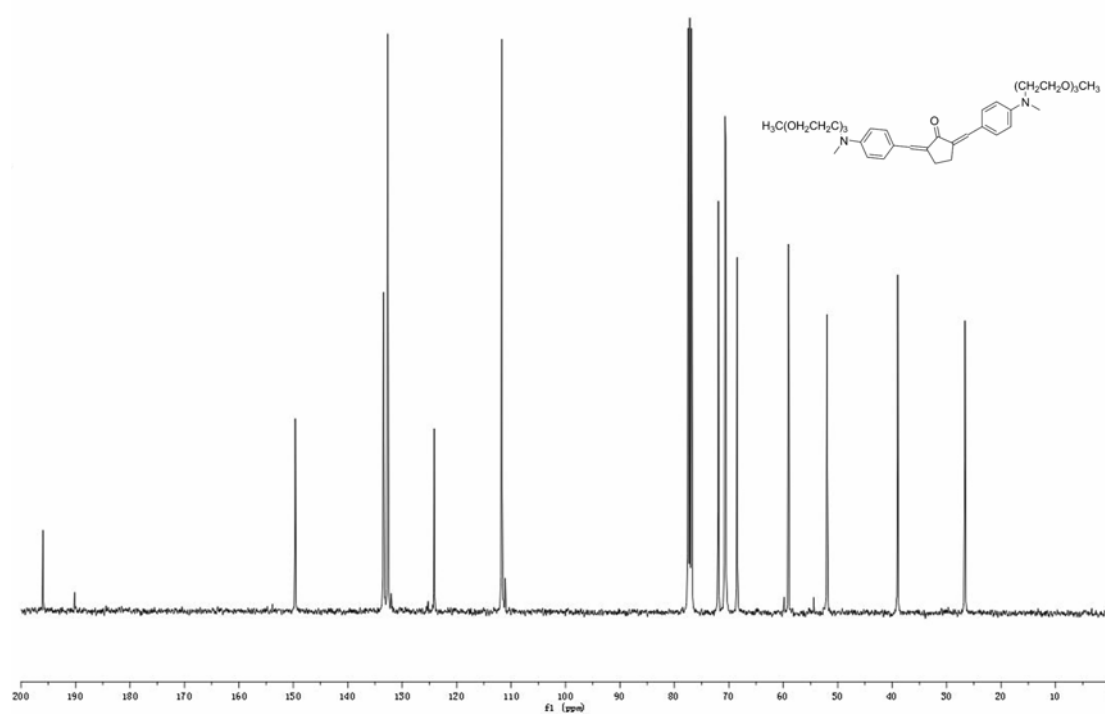

5.  $^1\text{H}$ NMR spectrum of dye **A3** ( $\text{CDCl}_3$ , 400MHz)

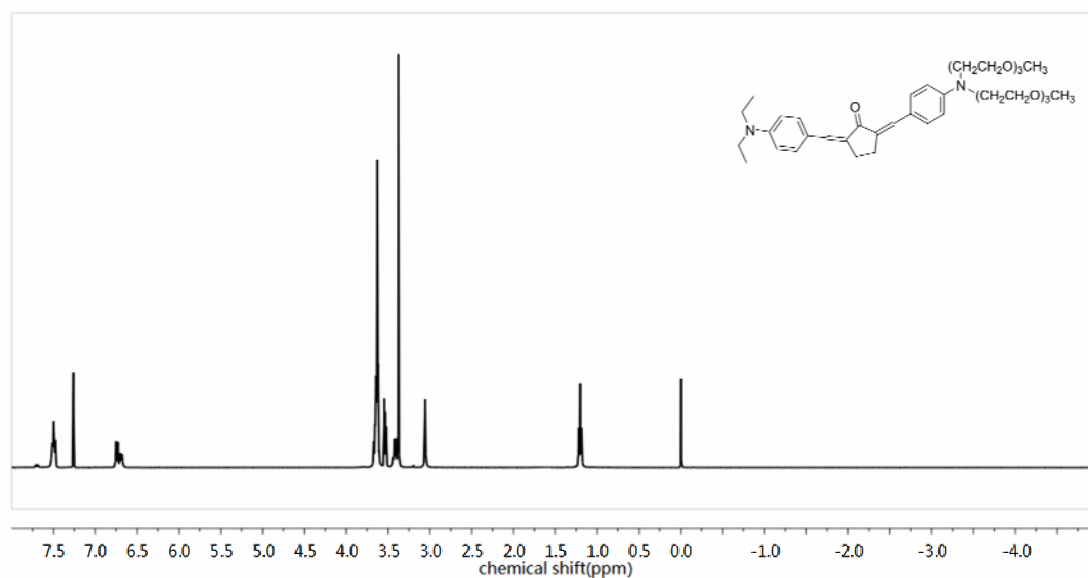

6.  $^{13}\text{C}$ NMR spectrum of dye **A3** ( $\text{CDCl}_3$ , 400MHz)

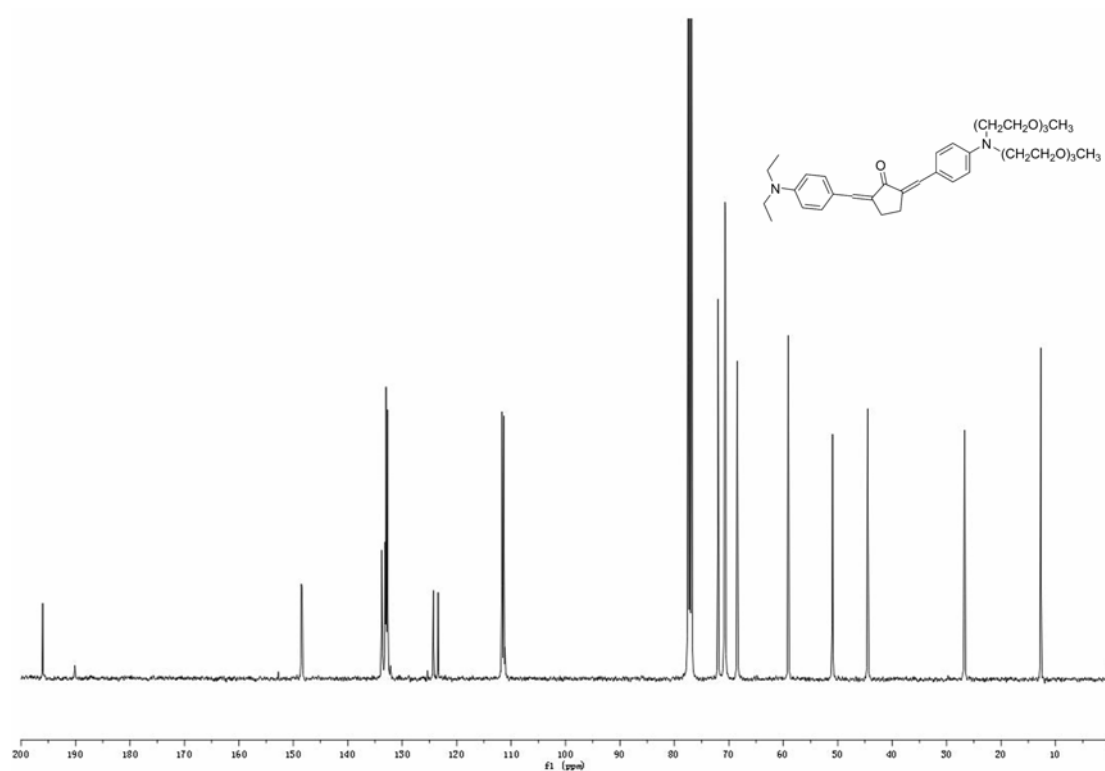

7.  $^1\text{H}$ NMR spectrum of dye **A4** ( $\text{CDCl}_3$ , 400MHz)

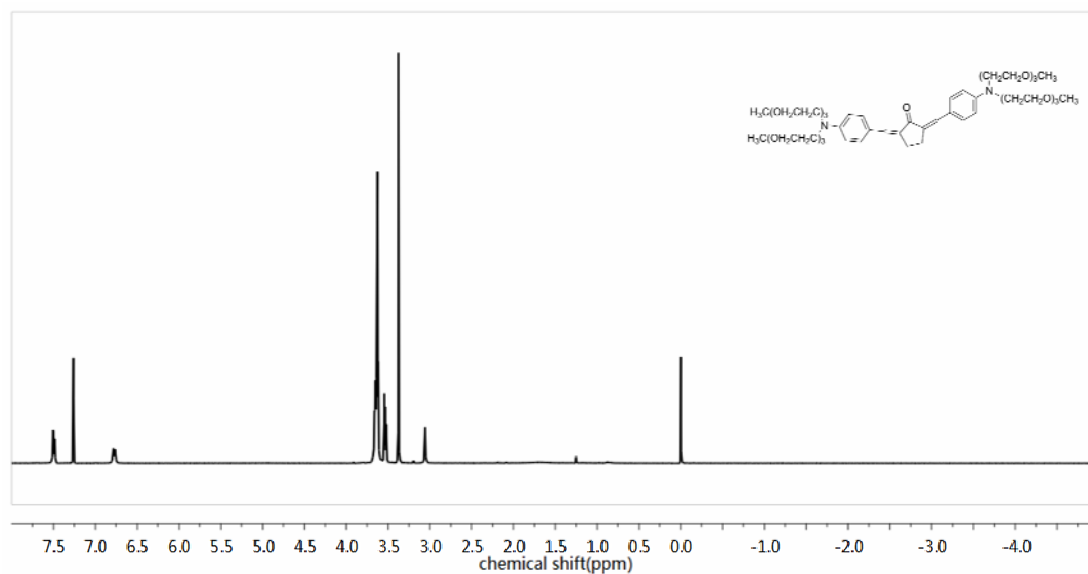

8.  $^{13}\text{C}$ NMR spectrum of dye **A4** ( $\text{CDCl}_3$ , 400MHz)

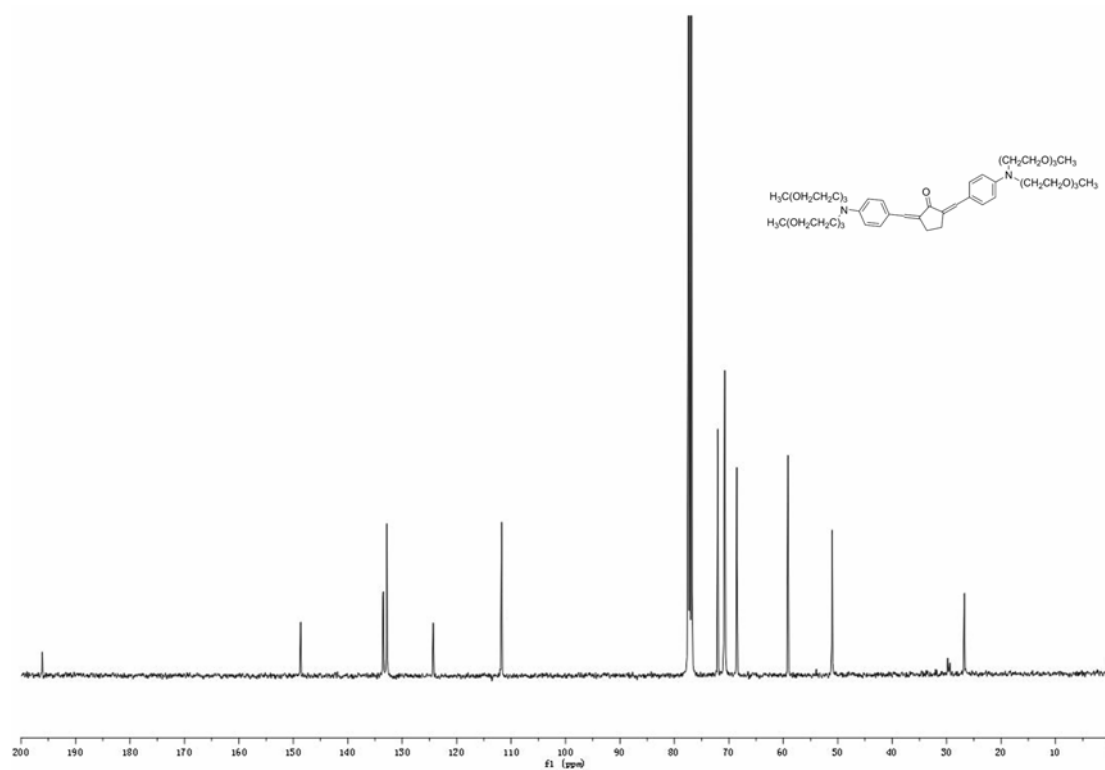

9.  $^1\text{H}$ NMR spectrum of dye **B1** ( $\text{CDCl}_3$ , 400MHz)

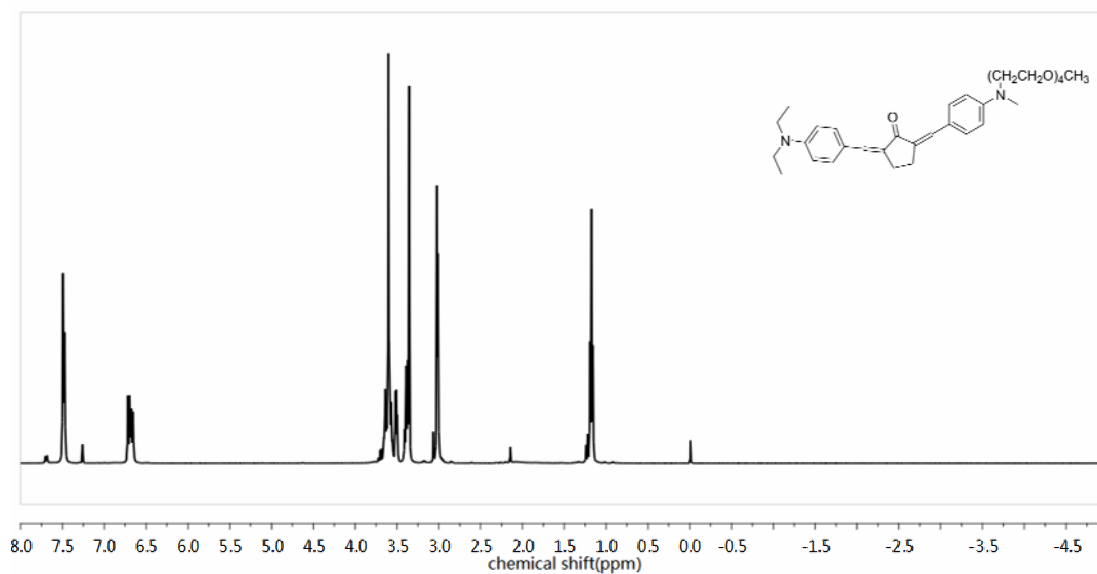

10.  $^{13}\text{C}$ NMR spectrum of dye **B1** ( $\text{CDCl}_3$ , 400MHz)

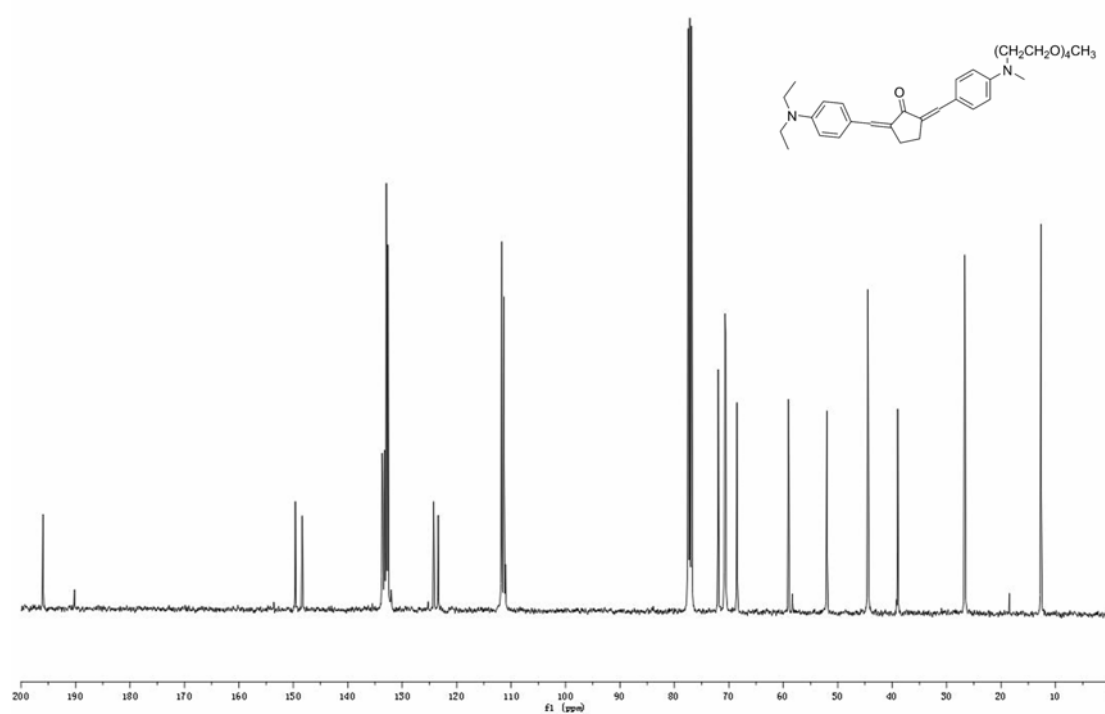

11.  $^1\text{H}$ NMR spectrum of dye **B2** ( $\text{CDCl}_3$ , 400MHz)

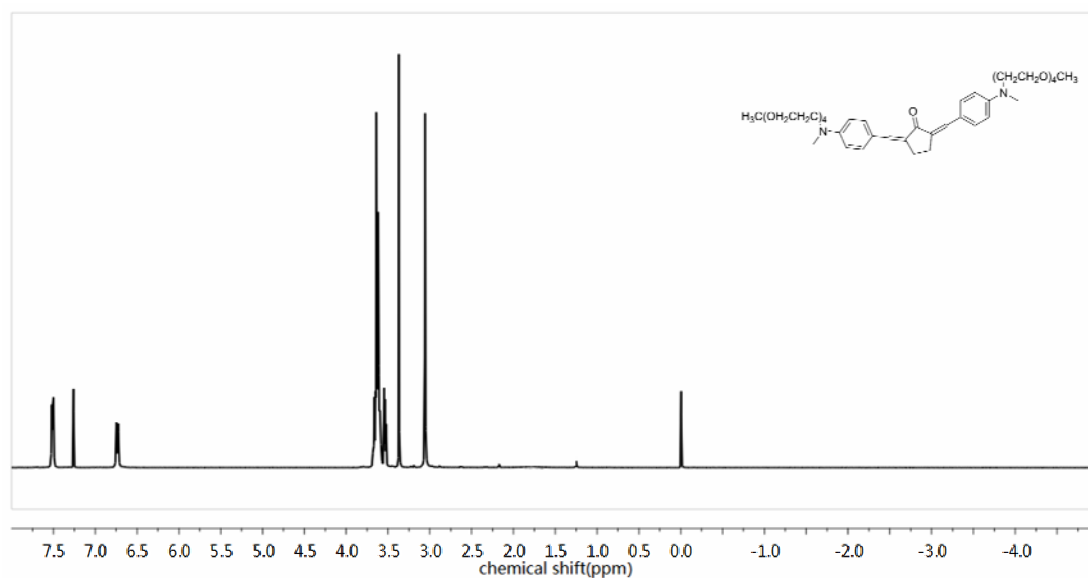

12.  $^{13}\text{C}$ NMR spectrum of dye **B2** ( $\text{CDCl}_3$ , 400MHz)

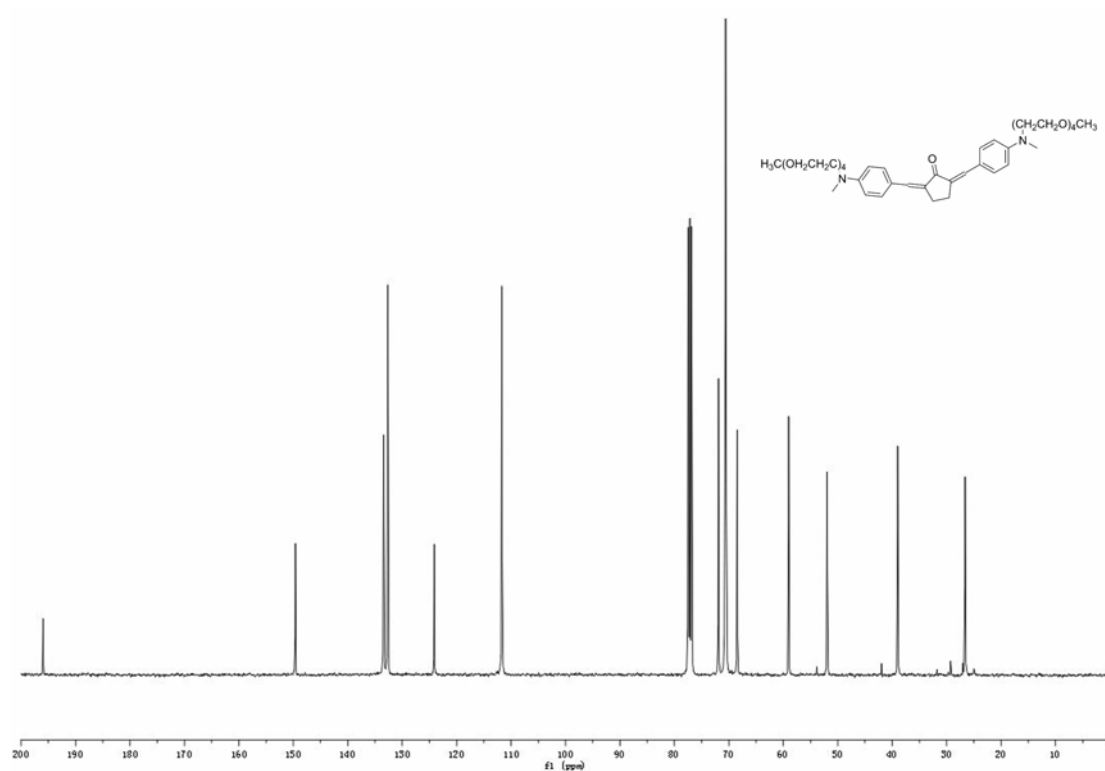



13.  $^1\text{H}$ NMR spectrum of dye **B3** ( $\text{CDCl}_3$ , 400MHz)

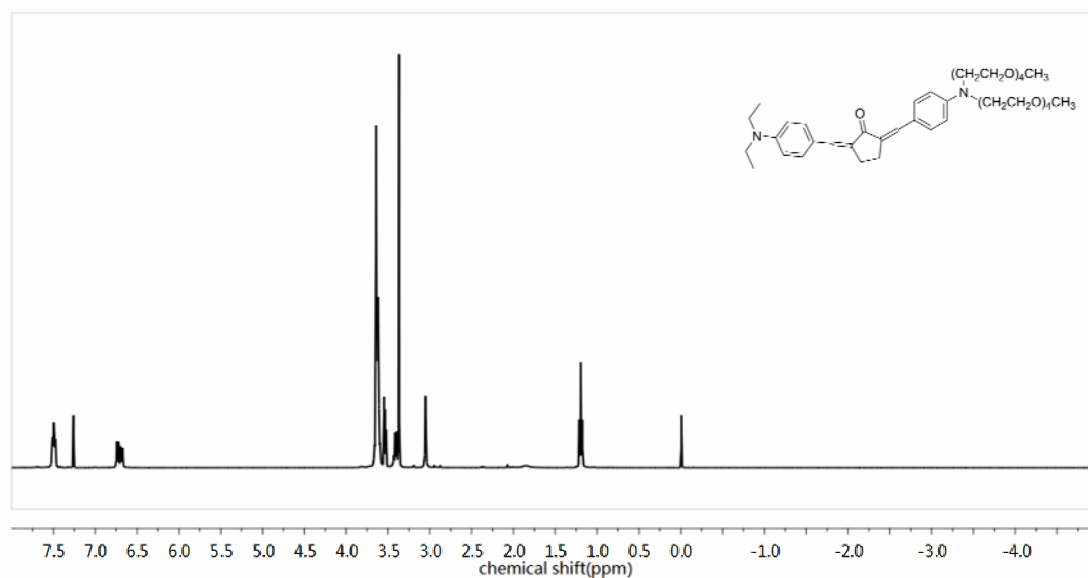

14.  $^{13}\text{C}$ NMR spectrum of dye **B3** ( $\text{CDCl}_3$ , 400MHz)

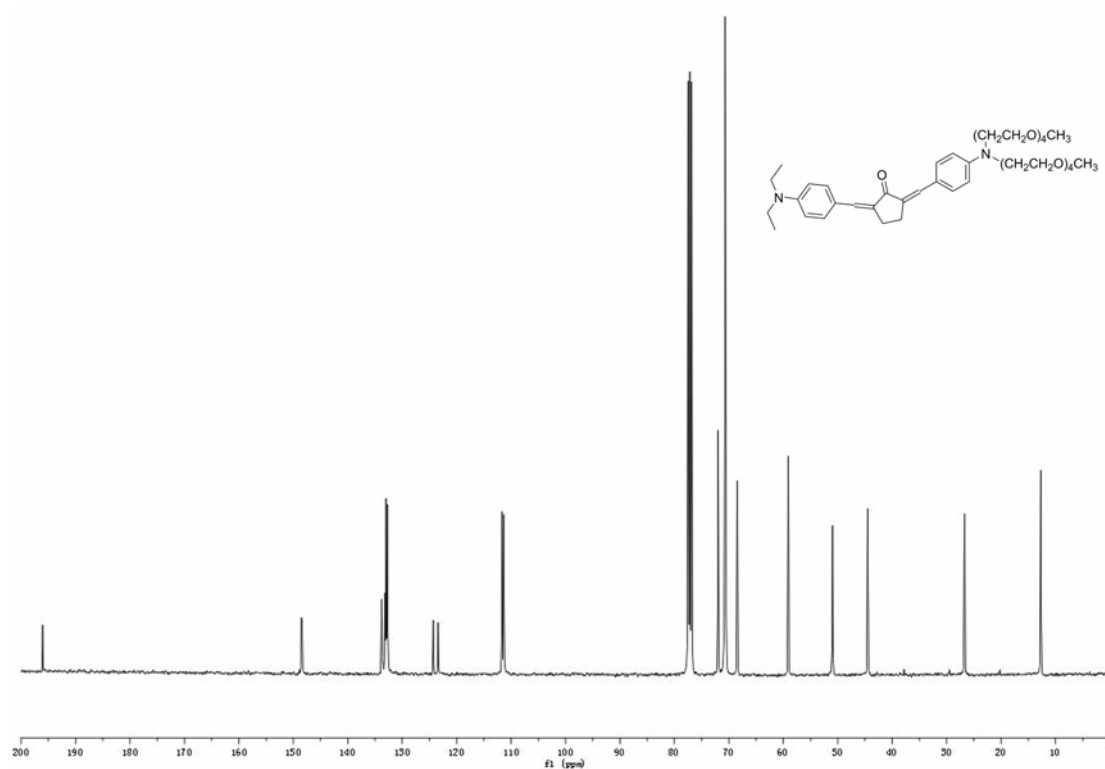

15.  $^1\text{H}$ NMR spectrum of dye **B4** ( $\text{CDCl}_3$ , 400MHz)

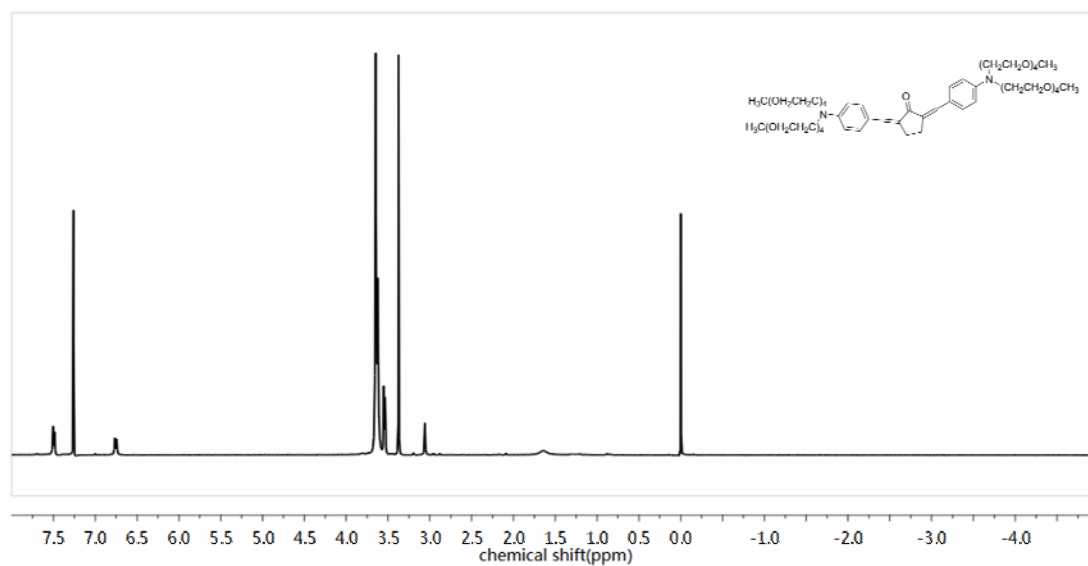

16.  $^{13}\text{C}$ NMR spectrum of dye **B4** ( $\text{CDCl}_3$ , 400MHz)

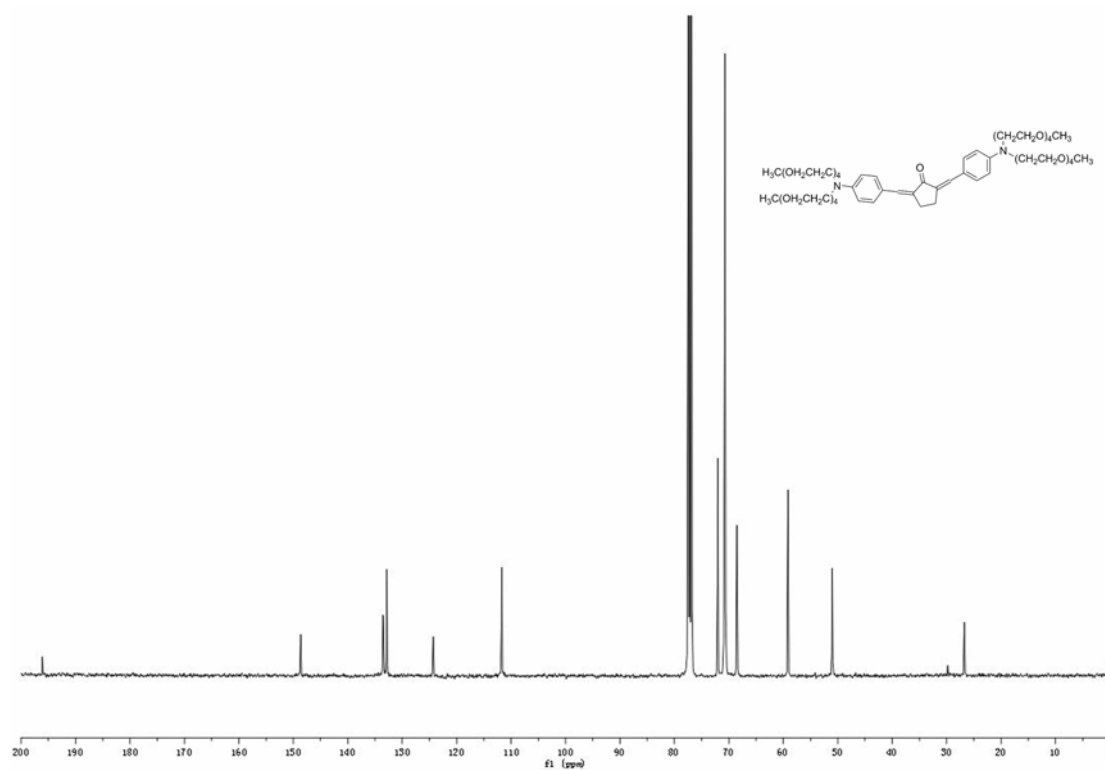

Supplement: c0ob01278e.pdf [file c0ob01278e.pdf]
